# Supplementary material
Source: publisher figshare collection journal article supplement (https://gsajournals.figshare.com/ndownloader/files/21057333)
Supplement: Supplementary file 1 [file 21057333]

## Sheet: female post-mating_Expression
Table S1: Summary of previous gene expression studies on females post-mating
Study	Tissue	Time post mating	Genotype/strain	Other notes
McGraw et al. 2004	Whole flies	1-3hrs	Canton S females mated to Canton S males or tud1 males or DTA-E males (no sperm or Acps)
Lawniczak et al. 2004	Whole flies	2 hrs	WI-96 (winters line)	Also examined courted females
Mack et al. 2006	Lower reproductive tract	0 hrs	Wild-caught flies from GA isogenic on chr II and III
		3 hrs
		6 hrs
		24 hrs
McGraw et al. 2008	Whole flies	1-3 hrs	Canton S females mated to males lacking specific Acps
		6-8 hrs
		12 hrs
		24 hrs
Kapelnikov et al. 2008	Oviducts	3 hrs	Canton S
McGraw et al. 2009	Whole flies	1-3 hrs	Canton S and Oregon R
Innocenti and Morrow 2009	Whole Flies	6 hrs	LHM (large outbred WT population)	Multiply mated
Dalton et al. 2010	Head and CNS tissues	0-2hr	Canton S mated to w; P[UAS-dj-GFP] males
		24 hrs
		48 hrs
		72 hrs
Parisi et al. 2010	Gonadectomized whole female flies	<1 hr	gs(1)N441 or tud1
Gioti et al. 2012	Abdomen and head/thorax	3-6 hrs	Dahomey females mated to SP-null and SP-control males
Short and Lazzaro 2013	Whole flies	12.5 hrs	tud1	Infected and sham infected
Fear et al. 2016	Head tissues	Not specified	68 naturally derived strains
Delbare et al. 2017	Whole flies	5-6 hrs	5 inbred lines from geographically diverse locations
Fowler et al. 2019	Abdomen and head/thorax	3 hours	Dahomey	examined mRNA and miRNA in both males and females post-mating

## Sheet: female post-mating_Behavior
Comparison of behavioral results to relevant results of previous studies
Food preference for yeast
Known:	New:
Ribeiro and Dickson 2010:	· tud/+ females that have no germline show preference for yeast after mating. While it was clear that there is a post-mating preference for yeast, this change was not previously shown to require the female germline.
· Mated females show preference for yeast over sucrose	· Females mated to males lacking sperm show preference for yeast after mating
· Requires Sex Peptide signaling as Sex Peptide Receptor mutant females or mated to sex peptide null males do not show preference for yeast this can be rescued by expressing SPR in ppk+ neurons	· This study examined Berlin females and tud/+ females (with and without a germline). We show all strains/conditions show preference for yeast after mating.
· Sex peptide signaling in ppk+ neurons is required as expressing SPR in ppk+ neurons rescues the SPR mutant phenotype
· TOR/S6K modulates food choices
· ovoD1 mutant females that have early sterility had yeast food preference after three days on sucrose, similar to Canton S females. The ovoD1 females were not tested post-mating.
Vargas et al. 2010
· Used w1118 females and males
· Mated flies show preference for yeast
· Show S6K and serotonin are involved in post-mating dietary switch
Female mating--post-mating refractoriness
Known:	New:
Barnes et al. 2007	· Examination of tud/+ sterile females. Found no significant difference in re-mating between tud/+ females with and without a germline.
· Used germcell-less (gcl) and ovoD mutations to generate sterile females	· No differences in re-mating at either 1 and 3 days post-mating when comparing across the same mating conditions
· Examined mating/re-mating at 1-day post-mating	· Increased re-mating in Berlin females when mated to spermless males as first mating at 1-day (~78%)and 3 days (~93%) post-mating
· No differences in remating compared to controls for both gcl and OvoD sterile mutant females
· Also examined females mated to males lacking Sex Peptide
· Sterile females of both genotypes were more likely to remate when first mated to Sex Peptide mutant males
Chapman et al. 2003
· Examined females re-mating at 1 and 2 days post-mating when mated to males lacking SP or Accessory gland proteins
Liu and Kubli 2003
· Examined females re-mating at 4, 12, 24, and 48 hours after mating to SP-null males
Peng et al. 2005
· Examined females remating at 4, 12, 24, and 48 hours after mating to SP null and various SP mutants
Kalb et al. 1993
· Examined Ore-R females re-mating at 1, 2, and 7 days post-mating when mated to spermless tud males (no control specified)
· Re-mating rate of 43% at 1-day and 90% at 2 and 7 days
Xue and Noll 2000
· Examined Ore-R females re-mating at 12h, 1 day, and 2 days post-mating when mated to spermless tud males (do not report on tud germline controls)
· Re-mating rate of ~9% at 12 hours, 50% at 1-day and 90% at 2 days
Sleep
Known:	New:
Dove et al. 2017	· No one has examined sleep in tud/+ females, or females lacking a germline.
· CS and wCS females have decreased daytime sleep post-mating	· Our results show that there is a significant increase in sleep due to mating when Berlin females are mated to tud males that have sperm, but not when tud males lack sperm.
· Differences in mated and virgin sleep lasted 5 days post-mating	· We discover that both daytime and nighttime sleep are increased post-mating in tud progeny females without a germline, whereas nighttime sleep is decreased post-mating in control tud progeny females with a germline
· Neither virgin males nor virgin females differed from their mated counterparts in terms of nighttime sleep
· Also examined sleep after mating to males with reduced seminal fluid proteins (DTAE) or spermless (tudor)
· Females mated to reduced seminal fluid protein (DTAE) male flies slept more in the daytime compared to virgins and less in the daytime compared to WT males
· Nighttime sleep: females mated to males with reduced seminal fluid proteins (DTAE) slept less than virgins but the same as mated to WT males
· Mating to spermless resulted in a reduction in daytime sleep compared to virgins but no change compared to mating with WT males. No differences in nighttime sleep compared to virgins or mated to WT
Garbe et al. 2016
· Post-mating decrease in daytime sleep in multiple wild-type lines EXCEPT for white Berlin
· SFPless(DTA-E) and blocked ejaculation (corazonin silenced), SP-null, and spr mutant females
Isaac et al. 2010
· Females were Ore-R, CS, and Dah
· Mated females have reduced daytime sleep
· Females mated to Sex Peptide null males had same sleep as virgins
· Nightime sleep not impacted by mating status of females
· Also used tud males to show that change in siesta daytime sleep was not sperm-dependent
